# Supplementary material for: Association of polymorphisms at the microRNA binding site of the caprine KITLG 3′-UTR with litter size
Source: PubMed Central journal article supplement (PMC4863368; doi:10.1038/srep25691), 2016-05-11
Supplement: srep25691-s1.pdf [file srep25691-s1.pdf]

1 **Association of polymorphisms at the microRNA binding site of the caprine *KITLG***

2 **3'-UTR with litter size**

3

4 **Xiaopeng An<sup>1a</sup>, Yuxuan Song<sup>1a</sup>, Shuhai Bu<sup>1b</sup>, Haidong Ma<sup>a</sup>, Kexin Gao<sup>a</sup>, Jinxing Hou<sup>a</sup>,**

5 **Shan Wang<sup>a</sup>, Zhang Lei<sup>a</sup>, Binyun Cao<sup>a\*</sup>**

6

7

8

9

10

11

12

13

14

15

16

17

18

19

20

21

22

23

## Supplementary tables

24 **Table S1** Primer information of *KITLG* gene for detecting SNP and cloning 3'UTR

| Primer | Sequence (5'→3')                    | Objective    | GenBank accession |              | Product size (bp) | Ta (°C) |
|--------|-------------------------------------|--------------|-------------------|--------------|-------------------|---------|
|        |                                     |              | No.               | NM_001285670 |                   |         |
| KF1    | GCCTCCAGAAGCATCTAAC                 | Screening    | 1322              |              | 275               | 51      |
| KR1    | CAAGTTCAGACCCACATCC                 | polymorphism | 1596              |              |                   |         |
| KF2    | <u>CTCGAG</u> GCCTCCAGAAGCATCTAAC   | Cloning      | 1322              |              | 289               | 53      |
| KR2    | <u>GCGGCCGC</u> CAAGTTCAGACCCACATCC | 3'UTR        | 1596              |              |                   |         |
| KF3    | TAGCATCATCCACTGTTCAT                | Screening    | 1493              |              | 298               | 50      |
| KR3    | ATGCCTCCTTGGCAGAT                   | polymorphism | 1790              |              |                   |         |
| KF4    | GACTTAGGAGGAATCACTGA                | Screening    | 1908              |              | 386               | 50      |
| KR4    | AACGCAATGTCCATCTTG                  | polymorphism | 2293              |              |                   |         |
| KF5    | TGAGTGAATTTGGCAGGAA                 | Screening    | 2253              |              | 250               | 51      |
| KR5    | GGTGGTAGGATATGGCAATA                | polymorphism | 2502              |              |                   |         |
| KF6    | CCTTCAATAGAGTGACACAG                | Screening    | 2512              |              | 344               | 50      |
| KR6    | CAGGTCCTTACAGCCATTA                 | polymorphism | 2855              |              |                   |         |

25 Note: Ta = annealing temperature. The underlined bases in KF2/KR2 represent *XhoI* and *NotI* endonuclease  
 26 enzyme loci.

27

28

29

30

31

32

33

34

35 **Table S2** Primer information for real-time quantitative PCR

| GenBank accession No. | Gene           | Sequence (5'→3')        | Region | Product size (bp) | Ta (°C) |
|-----------------------|----------------|-------------------------|--------|-------------------|---------|
| NM_001285670          | <i>KITLG</i>   | F: GTTGCAGCCAGCTCCCTTAG | 722    | 95                | 60      |
|                       |                | R: GCTACGGCTGCCCATTGTAG | 816    |                   |         |
| AF481159              | <i>β-actin</i> | F: CCAAAGCCAACCGTGAGAA  | 80     | 101               | 60      |
|                       |                | R: AGAGGCGTACAGGGACAGCA | 180    |                   |         |
| AJ431207              | <i>GAPDH</i>   | F: CACCCTCAAGATTGTCAGC  | 324    | 106               | 60      |
|                       |                | R: CAGTGGTCATAAGTCCCTCC | 430    |                   |         |

36

37

38

39

40

41

42

43

44

45

46

47

48

49

50

51 **Table S3** Genotypic distribution of three loci in the caprine *KITLG* gene

| Locus                     |                           | Number of animals |                 |     |
|---------------------------|---------------------------|-------------------|-----------------|-----|
| c. 1389C>T                | Genotype                  | CC                | 227             |     |
|                           |                           | CT                | 46              |     |
|                           |                           | TT                | 112             |     |
|                           | Allele                    | C                 | 0.65            |     |
|                           |                           | T                 | 0.35            |     |
|                           | He                        | 0.12              |                 |     |
|                           | PIC                       | 0.35              |                 |     |
|                           | Equilibrium $\chi^2$ test |                   |                 |     |
|                           | c.1457A>C                 | Genotype          | AA              | 150 |
|                           |                           |                   | AC              | 77  |
| CC                        |                           |                   | 158             |     |
| Allele                    |                           | A                 | 0.49            |     |
|                           |                           | C                 | 0.51            |     |
| He                        |                           | 0.20              |                 |     |
| PIC                       |                           | 0.37              |                 |     |
| Equilibrium $\chi^2$ test |                           |                   | <i>P</i> <0.001 |     |
| c.1520G>A                 |                           | Genotype          | GG              | 227 |
|                           |                           |                   | GA              | 46  |
|                           | AA                        |                   | 112             |     |
|                           | Allele                    | G                 | 0.65            |     |
|                           |                           | A                 | 0.35            |     |
|                           | He                        | 0.12              |                 |     |
|                           | PIC                       | 0.35              |                 |     |
|                           | Equilibrium $\chi^2$ test |                   | <i>P</i> <0.001 |     |

52

53

54

55

56

57
